# Supplementary material for: Investigation of thermochromic photoluminescent, dielectric and crystal structural properties for an inorganic–organic hybrid solid of [1-hexyl-3-methylimidazolium][PbBr3]
Source: Royal Society of Chemistry journal article supplement (doi:10.1039/c6nj01508e), 2016-01-01
Supplement: c6nj01508e1.pdf [file c6nj01508e1.pdf]

## Electronic Supplementary Information

### Investigation of thermochromic photoluminescent, dielectric and crystal structural properties for an inorganic-organic hybrid solid of [1-hexyl-3-methylimidazolium][PbBr<sub>3</sub>]

Kun-Ming Wan,<sup>a</sup> Yuan-Bo Tong,<sup>a</sup> Li-Li,<sup>a</sup> Yang Zou,<sup>\*a, b</sup> Hai-Bao Duan,<sup>a</sup> Jian-Lan Liu,<sup>a</sup> Xiao-Ming Ren<sup>\*a,b,c</sup>

<sup>a</sup> State Key Laboratory of Materials-Oriented Chemical Engineering and College of Science, Nanjing Tech University, Nanjing 210009, P. R. China

<sup>b</sup> College of Materials Science and Engineering, Nanjing Tech University, Nanjing 210009, P.R. China

<sup>c</sup> State Key Lab & Coordination Chemistry Institute, Nanjing University, Nanjing 210093, P. R. China

Tel.: +86 25 58139476

Fax: +86 25 58139481

Email: [xmren@njtech.edu.cn](mailto:xmren@njtech.edu.cn)

‡ **Kun-Ming Wan and Yuan-Bo Tong contribute equally.**

## Contents

Fig. S1: Powder X-ray diffraction patterns for as-prepared sample of **1**, confirming the phase purity of the as-prepared sample (Blue lines: experimental patterns; red lines: simulated profiles).

Fig. S2: FT-IR spectra for **1** ( $\nu_{\text{C=N}} = 1622 \text{ cm}^{-1}$ ).

Fig. S3: The weak interaction of C-H...Br between organic cation and inorganic anion for **1**.

Fig. S4: (a) Plots of imaginary ( $\epsilon''$ ) parts of dielectric permittivity versus temperature in 123-353 K (b) DSC curves with two sequentially heating-cooling runs in 223-353 K for **1**.

Fig. S5: PL spectrum (a) at 10 K and (b) at 300 K with  $\lambda_{\text{ex}} = 325 \text{ nm}$  of **1**.

Fig. S6: (a) Peak intensity and (b) peak intensity ratio at selected temperatures (c, d) the ratio of peak intensity at selected temperatures towards the peak intensity of 300 K for every emission band.

Table S1: Parameters of impedance from fits for **1** at selected temperatures.

Table S2: Atom displacement parameters ( $U_{\text{eq}}$ ,  $U_{11}$ ,  $U_{22}$  and  $U_{33}$ ) for cations of **1** at 173, 223, 243, 263, 283 and 313 K.

Table S3: CIE chromaticity of **1** at different temperatures.

Table S4: Intensity and intensity ratio of emission bands at selected temperatures for **1**.

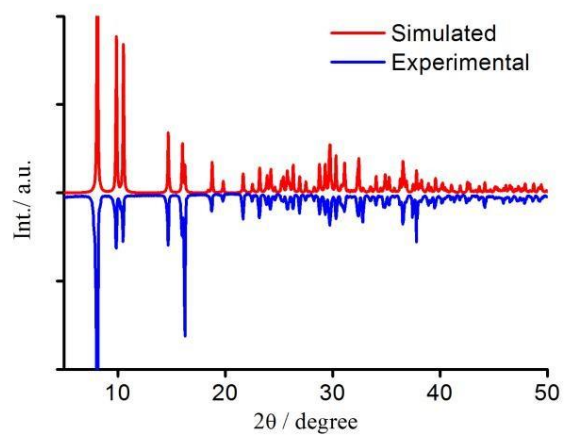

Fig. S1: Powder X-ray diffraction patterns for as-prepared sample of **1**, confirming the phase purity of the as-prepared sample (Blue lines: experimental patterns; red lines: simulated profiles).

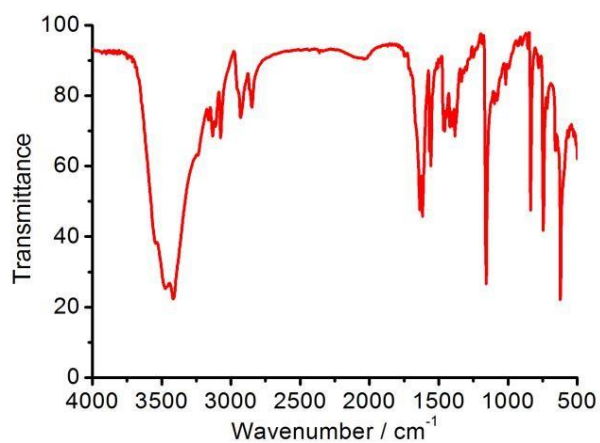

Fig. S2: FT-IR spectra for **1** ( $\nu_{\text{C=N}} = 1622 \text{ cm}^{-1}$ )

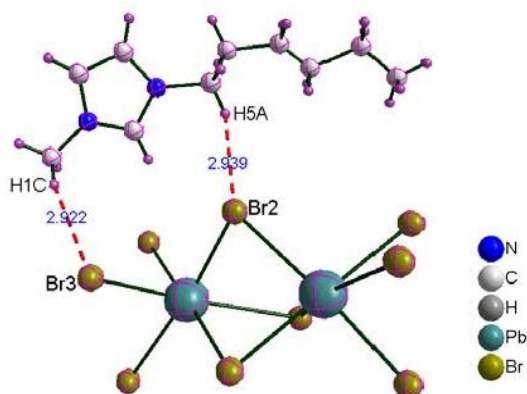

Fig. S3: The weak interaction of C-H...Br between organic cation and inorganic anion for **1** at room temperature.

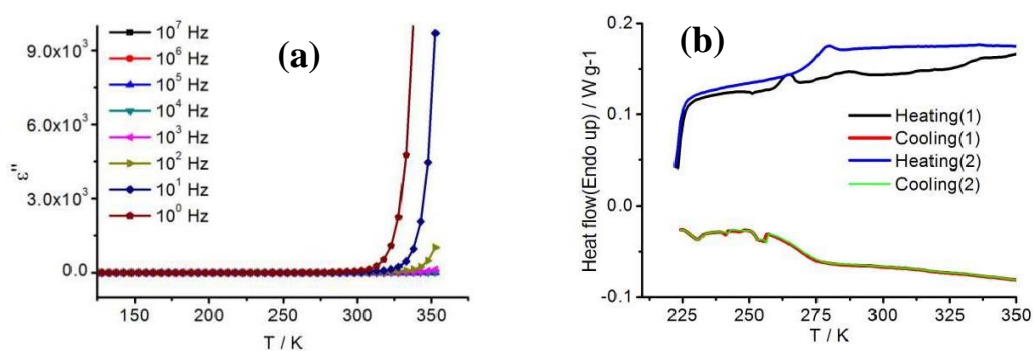

Fig. S4: (a) Plots of imaginary ( $\epsilon''$ ) parts of dielectric permittivity versus temperature in 123-353 K (b) DSC curves with two sequentially heating-cooling runs in 223-353 K for **1**.

**Table S1:** Parameters of impedance from fits for **1** at selected temperatures.

| T / K                           | 333                    | 338                    | 343                    | 348                    | 353                    |
|---------------------------------|------------------------|------------------------|------------------------|------------------------|------------------------|
| R1 / $\Omega$                   | $7.582 \times 10^6$    | $5.056 \times 10^6$    | $2.965 \times 10^6$    | $1.752 \times 10^6$    | $8.961 \times 10^5$    |
| R2 / $\Omega$                   | $3.383 \times 10^7$    | $1.525 \times 10^7$    | $6.790 \times 10^6$    | $3.094 \times 10^6$    | $1.418 \times 10^6$    |
| $\sigma_1$ / $\text{S cm}^{-1}$ | $1.126 \times 10^{-8}$ | $1.688 \times 10^{-8}$ | $2.879 \times 10^{-8}$ | $4.872 \times 10^{-8}$ | $9.525 \times 10^{-8}$ |
| $\sigma_2$ / $\text{S cm}^{-1}$ | $2.523 \times 10^{-9}$ | $5.597 \times 10^{-9}$ | $1.257 \times 10^{-8}$ | $2.759 \times 10^{-8}$ | $6.019 \times 10^{-8}$ |

**Table S2:** Atom displacement parameters ( $U_{eq}$ ,  $U_{11}$ ,  $U_{22}$  and  $U_{33}$ ) for cations of **1** at 173, 223, 243, 263, 283 and 313 K.

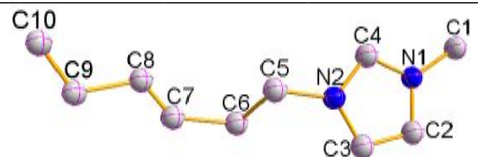

| Atom | Temp. / K | $U_{eq} / \text{\AA}^2$ | $U_{11} / \text{\AA}^2$ | $U_{22} / \text{\AA}^2$ | $U_{33} / \text{\AA}^2$ |
|------|-----------|-------------------------|-------------------------|-------------------------|-------------------------|
| C1   | 173       | 0.047(3)                | 0.067(7)                | 0.034(5)                | 0.057(7)                |
|      | 223       | 0.057(4)                | 0.081(10)               | 0.040(7)                | 0.071(10)               |
|      | 243       | 0.065(4)                | 0.093(12)               | 0.046(8)                | 0.076(12)               |
|      | 263       | 0.067(4)                | 0.090(11)               | 0.046(7)                | 0.087(12)               |
|      | 283       | 0.072(5)                | 0.096(12)               | 0.052(9)                | 0.094(13)               |
|      | 313       | 0.093(11)               | 0.12(3)                 | 0.07(2)                 | 0.11(3)                 |
| C2   | 173       | 0.0297(18)              | 0.021(4)                | 0.033(4)                | 0.039(5)                |
|      | 223       | 0.035(3)                | 0.027(5)                | 0.033(6)                | 0.047(7)                |
|      | 243       | 0.040(3)                | 0.030(6)                | 0.040(7)                | 0.050(8)                |
|      | 263       | 0.046(3)                | 0.029(5)                | 0.050(7)                | 0.059(8)                |
|      | 283       | 0.047(3)                | 0.033(6)                | 0.053(8)                | 0.053(8)                |
|      | 313       | 0.058(7)                | 0.041(15)               | 0.045(13)               | 0.08(2)                 |
| C3   | 173       | 0.0265(16)              | 0.022(4)                | 0.027(4)                | 0.035(4)                |
|      | 223       | 0.033(2)                | 0.021(5)                | 0.046(7)                | 0.037(6)                |
|      | 243       | 0.038(3)                | 0.025(5)                | 0.050(7)                | 0.043(7)                |
|      | 263       | 0.043(3)                | 0.035(6)                | 0.046(6)                | 0.050(7)                |
|      | 283       | 0.045(3)                | 0.037(6)                | 0.049(7)                | 0.056(8)                |
|      | 313       | 0.053(6)                | 0.028(12)               | 0.067(15)               | 0.077(19)               |
| C4   | 173       | 0.0290(17)              | 0.018(3)                | 0.041(5)                | 0.031(4)                |
|      | 223       | 0.034(2)                | 0.029(5)                | 0.039(6)                | 0.040(6)                |
|      | 243       | 0.038(3)                | 0.033(6)                | 0.039(6)                | 0.042(7)                |
|      | 263       | 0.041(3)                | 0.035(5)                | 0.045(6)                | 0.052(7)                |
|      | 283       | 0.046(3)                | 0.038(6)                | 0.048(7)                | 0.059(8)                |
|      | 313       | 0.047(6)                | 0.052(14)               | 0.032(11)               | 0.061(16)               |
| C5   | 173       | 0.047(2)                | 0.056(6)                | 0.050(6)                | 0.036(5)                |
|      | 223       | 0.053(3)                | 0.056(8)                | 0.052(8)                | 0.049(8)                |
|      | 243       | 0.057(4)                | 0.071(9)                | 0.049(8)                | 0.050(8)                |
|      | 263       | 0.059(3)                | 0.064(8)                | 0.050(8)                | 0.063(9)                |
|      | 283       | 0.064(4)                | 0.068(9)                | 0.056(9)                | 0.071(11)               |
|      | 313       | 0.071(8)                | 0.08(2)                 | 0.053(15)               | 0.08(2)                 |
| C6   | 173       | 0.044(2)                | 0.061(6)                | 0.043(6)                | 0.033(5)                |
|      | 223       | 0.061(4)                | 0.082(11)               | 0.055(9)                | 0.046(8)                |
|      | 243       | 0.074(5)                | 0.104(14)               | 0.060(10)               | 0.055(10)               |
|      | 263       | 0.078(5)                | 0.112(13)               | 0.054(9)                | 0.060(10)               |
|      | 283       | 0.088(6)                | 0.131(17)               | 0.063(11)               | 0.063(11)               |

|     |     |             |             |             |             |
|-----|-----|-------------|-------------|-------------|-------------|
|     | 313 | 0.101(12)   | 0.14(4)     | 0.06(2)     | 0.09(3)     |
| C7  | 173 | 0.145(11)   | 0.29(3)     | 0.115(15)   | 0.057(10)   |
|     | 223 | 0.157(15)   | 0.30(5)     | 0.092(18)   | 0.09(2)     |
|     | 243 | 0.160(15)   | 0.29(5)     | 0.093(19)   | 0.11(2)     |
|     | 263 | 0.168(14)   | 0.26(4)     | 0.099(19)   | 0.13(2)     |
|     | 283 | 0.190(17)   | 0.25(4)     | 0.13(3)     | 0.15(3)     |
|     | 313 | 0.17(3)     | 0.23(7)     | 0.08(3)     | 0.15(5)     |
|     | C8  | 173         | 0.119(8)    | 0.24(2)     | 0.062(9)    |
| 223 |     | 0.153(15)   | 0.29(4)     | 0.068(15)   | 0.17(3)     |
| 243 |     | 0.168(17)   | 0.32(5)     | 0.081(18)   | 0.18(3)     |
| 263 |     | 0.190(18)   | 0.31(5)     | 0.087(18)   | 0.24(4)     |
| 283 |     | 0.24(3)     | 0.38(6)     | 0.09(2)     | 0.34(6)     |
| 313 |     | 0.26(5)     | 0.41(12)    | 0.05(3)     | 0.35(11)    |
| C9  |     | 173         | 0.085(5)    | 0.106(12)   | 0.098(11)   |
|     | 223 | 0.108(9)    | 0.126(19)   | 0.112(18)   | 0.112(19)   |
|     | 243 | 0.118(10)   | 0.13(2)     | 0.12(2)     | 0.12(2)     |
|     | 263 | 0.130(10)   | 0.16(2)     | 0.124(19)   | 0.13(2)     |
|     | 283 | 0.154(14)   | 0.20(3)     | 0.15(3)     | 0.15(3)     |
|     | 313 | 0.20(4)     | 0.22(7)     | 0.20(6)     | 0.26(8)     |
|     | C10 | 173         | 0.097(6)    | 0.169(19)   | 0.074(10)   |
| 223 |     | 0.123(10)   | 0.21(3)     | 0.090(16)   | 0.100(19)   |
| 243 |     | 0.127(11)   | 0.21(3)     | 0.106(18)   | 0.082(17)   |
| 263 |     | 0.153(12)   | 0.26(4)     | 0.098(17)   | 0.14(2)     |
| 283 |     | 0.159(13)   | 0.26(4)     | 0.12(2)     | 0.13(3)     |
| 313 |     | 0.18(3)     | 0.26(8)     | 0.16(5)     | 0.14(5)     |
| N1  |     | 173         | 0.0259(14)  | 0.027(3)    | 0.025(3)    |
|     | 223 | 0.031(2)    | 0.031(5)    | 0.030(5)    | 0.039(5)    |
|     | 243 | 0.034(2)    | 0.034(5)    | 0.033(5)    | 0.041(6)    |
|     | 263 | 0.037(2)    | 0.035(5)    | 0.042(5)    | 0.039(5)    |
|     | 283 | 0.040(2)    | 0.037(5)    | 0.041(6)    | 0.046(6)    |
|     | 313 | 0.046(5)    | 0.040(12)   | 0.044(11)   | 0.061(14)   |
|     | N2  | 173         | 0.0285(15)  | 0.027(3)    | 0.036(4)    |
| 223 |     | 0.032(2)    | 0.031(5)    | 0.030(5)    | 0.034(5)    |
| 243 |     | 0.037(2)    | 0.037(5)    | 0.036(5)    | 0.040(6)    |
| 263 |     | 0.038(2)    | 0.037(5)    | 0.039(5)    | 0.040(5)    |
| 283 |     | 0.043(2)    | 0.046(6)    | 0.039(5)    | 0.042(6)    |
| 313 |     | 0.048(5)    | 0.049(12)   | 0.034(9)    | 0.062(14)   |
| Pb1 |     | 173         | 0.01914(10) | 0.02582(16) | 0.01415(16) |
|     | 223 | 0.02328(15) | 0.0279(2)   | 0.0174(2)   | 0.0282(2)   |
|     | 243 | 0.02575(15) | 0.0302(2)   | 0.0193(2)   | 0.0315(3)   |
|     | 263 | 0.02757(14) | 0.0308(2)   | 0.02115(19) | 0.0345(2)   |
|     | 283 | 0.03007(15) | 0.0335(2)   | 0.0226(2)   | 0.0381(3)   |
|     | 313 | 0.0330(4)   | 0.0366(6)   | 0.0230(4)   | 0.0432(6)   |
|     | Br1 | 173         | 0.02507(18) | 0.0273(4)   | 0.0338(4)   |

|     |     |             |            |            |            |
|-----|-----|-------------|------------|------------|------------|
|     | 223 | 0.0320(3)   | 0.0357(6)  | 0.0408(6)  | 0.0225(5)  |
|     | 243 | 0.0356(3)   | 0.0394(6)  | 0.0450(7)  | 0.0251(6)  |
|     | 263 | 0.0379(3)   | 0.0414(6)  | 0.0477(6)  | 0.0268(5)  |
|     | 283 | 0.0415(3)   | 0.0465(6)  | 0.0506(7)  | 0.0304(6)  |
|     | 313 | 0.0458(6)   | 0.0514(15) | 0.0536(13) | 0.0352(13) |
| Br2 | 173 | 0.03000(19) | 0.0287(4)  | 0.0262(4)  | 0.0326(4)  |
|     | 223 | 0.0369(3)   | 0.0313(6)  | 0.0307(6)  | 0.0428(7)  |
|     | 243 | 0.0403(3)   | 0.0338(6)  | 0.0330(6)  | 0.0477(7)  |
|     | 263 | 0.0433(3)   | 0.0346(6)  | 0.0369(6)  | 0.0511(7)  |
|     | 283 | 0.0468(3)   | 0.0373(6)  | 0.0396(6)  | 0.0557(8)  |
|     | 313 | 0.0519(7)   | 0.0400(14) | 0.0402(12) | 0.0676(18) |
| Br3 | 173 | 0.02844(19) | 0.0422(4)  | 0.0202(4)  | 0.0374(4)  |
|     | 223 | 0.0359(3)   | 0.0484(6)  | 0.0266(5)  | 0.0475(7)  |
|     | 243 | 0.0398(3)   | 0.0523(7)  | 0.0300(6)  | 0.0531(8)  |
|     | 263 | 0.0425(3)   | 0.0546(7)  | 0.0329(5)  | 0.0563(7)  |
|     | 283 | 0.0458(3)   | 0.0582(7)  | 0.0357(6)  | 0.0610(8)  |
|     | 313 | 0.0518(7)   | 0.0637(16) | 0.0356(11) | 0.0757(19) |

**Table S3:** CIE chromaticity of **1** at different temperatures

| T / K | CIE x  | CIE y  | Peak center                      | Relative intensity |
|-------|--------|--------|----------------------------------|--------------------|
|       |        |        | location(nm)<br>(compound light) |                    |
| 10    | 0.2616 | 0.1799 | 452                              | 2874210            |
| 25    | 0.3082 | 0.21   | 454                              | 1825780            |
| 40    | 0.3594 | 0.2419 | 667                              | 1402310            |
| 55    | 0.418  | 0.2823 | 636                              | 1441270            |
| 70    | 0.4728 | 0.3212 | 640                              | 1495400            |
| 85    | 0.5021 | 0.3455 | 635                              | 1270380            |
| 100   | 0.5165 | 0.3622 | 632                              | 1077250            |
| 115   | 0.5216 | 0.3718 | 635                              | 755367             |
| 140   | 0.5228 | 0.38   | 628                              | 449142             |
| 165   | 0.5163 | 0.3926 | 626                              | 285068             |
| 190   | 0.5067 | 0.4017 | 620                              | 198835             |
| 215   | 0.4936 | 0.4074 | 620                              | 128919             |
| 240   | 0.4789 | 0.4096 | 623                              | 78879              |
| 265   | 0.4668 | 0.4069 | 615                              | 51912              |
| 300   | 0.4444 | 0.4024 | 613                              | 27000              |

**Table S4:** Intensity and intensity ratio of emission bands in selected temperatures for 1.

| T / K | Peak 1<br>intensity ( $I_{T1}$ ) | Peak 2<br>intensity ( $I_{T2}$ ) | $I_{T1} / I_{300(1)}$ | $I_{T2} / I_{300(2)}$ | $I_{T1}/I_{T2}$ |
|-------|----------------------------------|----------------------------------|-----------------------|-----------------------|-----------------|
| 10    | 2.86E+06                         | 1.21E+06                         | 388.9300747           | 45.46902522           | 2.36099         |
| 25    | 1.81E+06                         | 1.32E+06                         | 246.4317719           | 49.42735075           | 1.37616         |
| 40    | 1.23E+06                         | 1.40E+06                         | 166.8553971           | 52.49522168           | 0.87732         |
| 55    | 777898                           | 1.44E+06                         | 105.6209097           | 53.93284113           | 0.54055         |
| 70    | 463928                           | 1.49E+06                         | 62.99090292           | 55.83517595           | 0.31139         |
| 85    | 267345                           | 1.27E+06                         | 36.299389             | 47.54637784           | 0.21073         |
| 100   | 172564                           | 1.07E+06                         | 23.43027834           | 40.06521006           | 0.16142         |
| 115   | 102667                           | 754455                           | 13.93985064           | 28.27474422           | 0.13608         |
| 140   | 55183                            | 446086                           | 7.492600136           | 16.71798523           | 0.1237          |
| 165   | 33774                            | 280595                           | 4.585743381           | 10.51587153           | 0.12037         |
| 190   | 25206                            | 198527                           | 3.422403259           | 7.440205374           | 0.12697         |
| 215   | 19160                            | 128595                           | 2.601493551           | 4.819360642           | 0.14899         |
| 240   | 13784                            | 78255                            | 1.87155465            | 2.932766181           | 0.17614         |
| 265   | 10633                            | 50173                            | 1.443720299           | 1.880335794           | 0.21193         |
| 300   | 7365                             | 26683                            | 1                     | 1                     | 0.27602         |

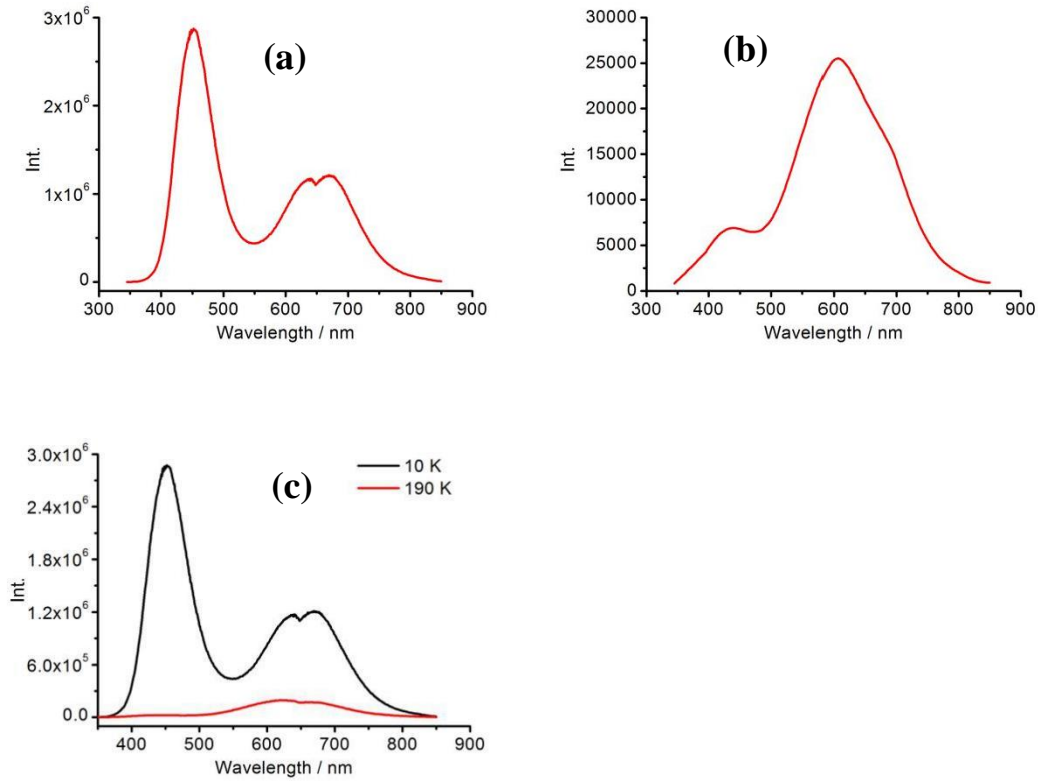

Fig. S5: PL spectrum (a) at 10 K (b) at 300 K and (c) comparison between 10 and 190



K with  $\lambda_{\text{ex}} = 325 \text{ nm}$  for **1**.

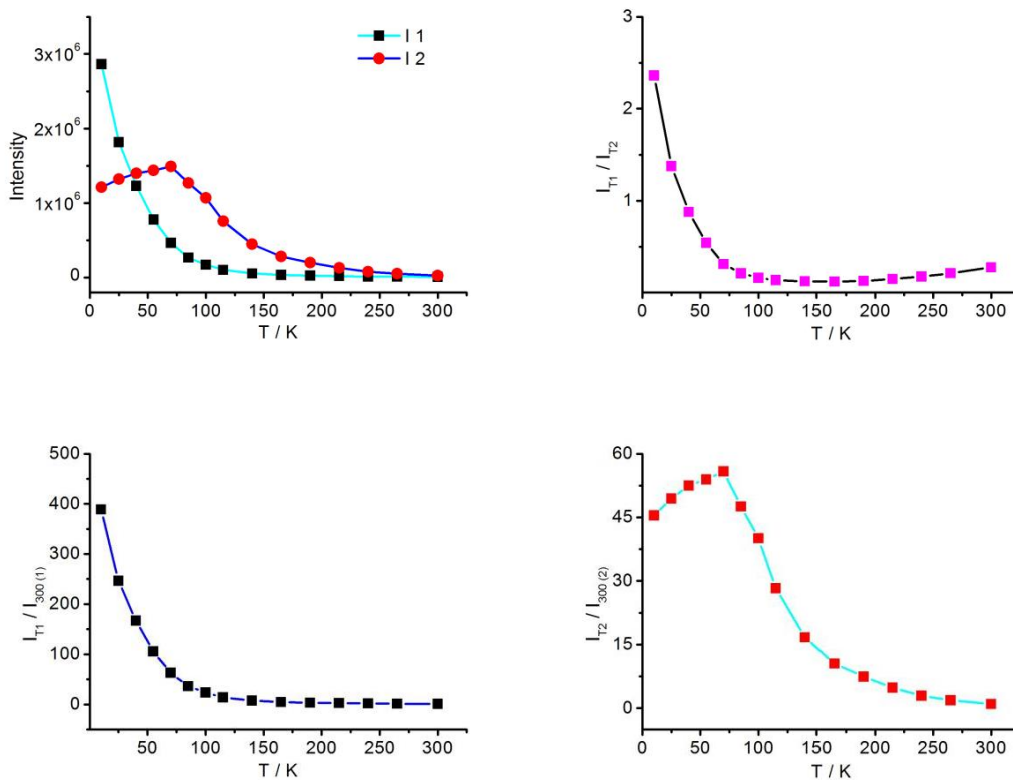

Fig.S6: (a) Peak intensity and (b) peak intensity ratio at selected temperatures (c, d) the ratio of peak intensity at selected temperatures towards the peak intensity of 300 K for every emission band.
